## 1 Shared PKS modules in biosynthesis of synergistic laxaphycins

2  
3 Heinilä LMP<sup>1</sup>, Fewer DP<sup>1</sup>, Jokela J<sup>1</sup>, Wahlsten M<sup>1</sup>, Jortikka A<sup>1</sup> and Sivonen K<sup>1</sup>.

4 <sup>1</sup>Department of Microbiology, Faculty of Agriculture and Forestry, University of Helsinki, Helsinki,  
5 Finland

6 \* Correspondence:

7 Kaarina Sivonen

8 kaarina.sivonen@helsinki.fi

9  
10 Keywords: synergy, biosynthesis, natural product, laxaphycin, scytocyclamide, antifungal, cupin,  
11 dehydrobutyryne

### 12 13 Abstract

14  
15 Cyanobacteria produce a wide range of lipopeptides that exhibit potent membrane-disrupting  
16 activities. Laxaphycins consist of two families of structurally distinct macrocyclic lipopeptides that  
17 act in a synergistic manner to produce antifungal and antiproliferative activities. Laxaphycins are  
18 produced by range of cyanobacteria but their biosynthetic origins remain unclear. Here, we  
19 identified the biosynthetic pathways responsible for the biosynthesis of the laxaphycins produced  
20 by *Scytonema hofmannii* PCC 7110. We show that these laxaphycins, called scytocyclamides, are  
21 produced by this cyanobacterium and are encoded in a single biosynthetic gene cluster with  
22 shared polyketide synthase enzymes initiating two distinct non-ribosomal peptide synthetase  
23 pathways. To our knowledge, laxaphycins are the first clearly distinct polyketide synthase and non-  
24 ribosomal peptide synthetase hybrid natural products with shared branched biosynthesis. The  
25 unusual mechanism of shared enzymes synthesizing two distinct types of products may aid future  
26 research in identifying and expressing natural product biosynthetic pathways and in expanding the  
27 known biosynthetic logic of this important family of natural products.

### 28 29 Introduction

30  
31 Natural products are chemical compounds produced by living organisms, with research interest  
32 focused on discovery of new natural products with pharmaceutical applications (Spainhour, 2005;  
33 Newman and Cragg, 2016). Many bioactive natural products have complex chemical structures  
34 with rare chemical moieties that allow them to react with specific molecular targets and to kill or  
35 inhibit the growth of other organisms (Rodrigues et al., 2016). Cyanobacteria produce a wide  
36 variety of natural products with different activities and complicated structures (Demay et al., 2019;  
37 Huang and Zimba, 2019). Characterization of new natural products offers starting material for drug  
38 design as new active structures (Rodrigues et al., 2016). Characterization of the biosynthesis of  
39 these products advance methods in production of the structures through combinatorial  
40 biosynthesis (Kim et al., 2015). Many microbial and cyanobacterial natural products are  
41 constructed by polyketide synthases (PKS) and non-ribosomal peptide synthetases (NRPS) (Kehr  
42 et al., 2011; Dittmann et al., 2015). PKS and NRPS enzymes often act together and are encoded in  
43 joint gene clusters producing hybrid PKS/NRPS products (Miyanaaga et al., 2018). PKS and NRPS  
44 enzymes allow the production of complex structures with characteristic non-proteinogenic amino  
45 acids and the combination of non-ribosomal peptides (NRP) with polyketide chains and  
46 decorations (Evans et al., 2011). NRPS and PKS biosynthesis typically follow a co-linearity rule,  
47 where the genomic order of the catalytic domains corresponds to the order of the product structure  
48 (Guenzi et al., 1998; Callahan et al., 2009). The natural product family of laxaphycins are  
49 hypothesized to be produced by the PKS/NRPS hybrid pathway (Bornancin et al., 2015; Bornancin  
50 et al., 2019).

51  
52 Laxaphycins are cyanobacterial cyclic lipopeptides that fall in two distinct structural macrocycles  
53 consisting of either 11 amino acids (known as A-type laxaphycins) or 12 amino acids (known as B-  
54 type laxaphycins). Both types include  $\beta$ -aminooctanoic acid (Aoa) or  $\beta$ -aminodecanoic acid

55 (Ada)(Table 1). Eleven- and 12-residue laxaphycins have strong synergistic activity in antifungal  
56 and antiproliferative bioactivity assays (Frankmölle et al., 1992b; MacMillan et al., 2002; Cai et al.,  
57 2018). The biosynthetic origins of members of the laxaphycin family remains unclear. Despite  
58 sharing the same name, they are chemically distinct and are anticipated to be produced by distinct  
59 pathways. The nomenclature of laxaphycins is complicated due to the two distinct core types  
60 addressed as a single family. Furthermore, naming new members after the producing organisms  
61 and distinguishing variants with lettering is a poor indication of which type the variant belongs to.  
62 We refer to the two types as 11- and 12-residue laxaphycins. There are 30 diverse members  
63 assigned to the laxaphycin family reported to date (Table 1). The first laxaphycins to exhibit  
64 synergistic effects were described from *Anabaena laxa* (Frankmölle et al., 1992a; Frankmölle et al.,  
65 1992b). Here, we focused on laxaphycin variants called scytocyclamides produced by *Scytonema*  
66 *hofmannii* PCC 7110. *S. hofmannii* PCC 7110 was previously studied by our group and a methanol  
67 crude extract of the cells was antifungal but the active agent was not identified (Shishido et al.,  
68 2015).

69  
70 In this study, we describe the biosynthetic pathways responsible for the biosynthesis of  
71 scytocyclamides from *S. hofmannii* PCC 7110. We show that the two types of scytocyclamides are  
72 produced by shared PKS enzymes. These enzymes initiate two distinct NRPS pathways, which are  
73 exceptional to the PKS/NRPS colinearity rule. We also report the synergistic antifungal activity of  
74 scytocyclamides and three new laxaphycin variants (scytocyclamides A2, B2, and B3).

## 75 **Materials and Methods**

### 76 **Scytocyclamide purification**

77  
78 *S. hofmannii* PCC 7110 was grown in 5-L Erlenmeyer flasks with 2.7 L modified Z8 medium  
79 without source of combined nitrogen at 20-21°C with photon irradiation of 3-7  $\mu\text{mol(m)}^{-2}\text{(s)}^{-1}$  with  
80 constant sterilized air bubbling for 3-5 weeks. Cells were collected by decanting excess media and  
81 centrifugation at 8000  $\times$  g for 5 min. Cells were frozen at -80°C and freeze-dried with CHRIST  
82 BETA 2-8 LSC plus with a LYO CUBE 4-8 freeze drier. The total amount of freeze-dried biomass  
83 was 4 g.

84  
85  
86 For each gram of dry cells, 30 ml of methanol was used and the mixture was homogenized with  
87 Heidolph Silentcrusher M at 20 000 rpm for 30 s. The suspension was centrifuged 10 000  $\times$  g for 5  
88 min and supernatant was collected. Extraction of the precipitate was repeated with 30 ml of  
89 methanol. Chomatorex (Fuji-Davison Chemical Ltd., Aichi, Japan) chromatography silica ODS  
90 powder (10 ml) was added to the supernatant pool and the mixture was dried with rotary  
91 evaporator Büchi Rotavapor R-200 at 30°C. Solid phase extraction (SPE) was performed with  
92 Phenomenex SPE strata SI-1 silica 5 g/20 ml column, preconditioned with 20 ml isopropanol and  
93 20 ml of heptane. Silica ODS powder with the dry extract was added on top of the column and  
94 extracted with heptane, ethyl acetate, acetone, acetonitrile, and methanol with each fraction  
95 collected individually. Fractions were dried with nitrogen gas flow and re-dissolved in 1 ml of  
96 methanol for bioactivity assays. The active methanol fraction was further fractionated with liquid  
97 chromatography. Chromatography was performed with an Agilent 1100 Series liquid  
98 chromatograph with a Phenomenex Luna 5  $\mu\text{m}$  C18(2) (150  $\times$  10 mm, 100 Å) column. The sample  
99 was injected in 100- $\mu\text{l}$  batches and eluted with acetonitrile/isopropanol 1:1 (solvent B) and 0.1%  
100 HCOOH (solvent A) with a flow rate of 3 ml  $\text{min}^{-1}$  in the following four stages: 1, isocratic stage of  
101 43% solvent B in A for 15 min; 2, a linear gradient of solvent B from 43% to 60% in 10; 3, a linear  
102 gradient of solvent B from 60% to 81% in 5 min; and 4, a linear gradient of solvent B from 81% to  
103 100% in 6 min. Six scytocyclamide fractions were collected, dried with nitrogen, and weighed.

### 104 **3-hydroxyleucine feeding experiment**

105  
106  
107 *S. hofmannii* PCC 7110 was grown in 100-mL Erlenmeyer flasks with 41 mL modified Z8 medium  
108 without a source of combined nitrogen with 40  $\mu\text{M}$  of racemic 3-hydroxyleucine mixture of all four  
109

110 isomers (2-Amino-3-hydroxy-4-methylpentanoic acid, ABCR) to determine if 3-hydroxyleucine is  
111 utilized as a substrate in scytocyclamide production. Control cultivations were grown on the same  
112 medium without added 3-hydroxyleucine. For both media, three duplicates were cultivated at 20-21  
113 °C with photon irradiation of 3-7  $\mu\text{mol(m)}\text{-}2\text{(s)}\text{-}1$  for 17 days. Cells were collected by decanting  
114 excess media and centrifugation 8000  $\times$  g for 5 min. Cells were frozen at -80°C and freeze-dried  
115 with CHRIST BETA 2-8 LSC plus with a LYO CUBE 4-8 freeze drier. Freeze-dried biomass was  
116 weighed and extracted with 0.5 ml methanol and glass beads (0.5-mm glass beads, Scientific  
117 Industries Inc, USA) using a FastPrep cell disrupter two times for 25 s at a speed of 6.5 m/s.  
118 Samples were centrifuged at room temperature for 5 min at 10 000  $\times$  g and supernatant was  
119 collected.

120

#### 121 **Peptide identification by LC-MS**

122

123 *S. hoffmannii* PCC 7110 was grown in 500-mL Erlenmeyer flasks of with 250 mL modified Z8  
124 medium without a source of combined nitrogen at 20-21°C with photon irradiation of 3-7  $\mu\text{mol(m)}\text{-}$   
125 2(s)-1 with constant sterilized air bubbling for 4 weeks. Cells were collected by decanting excess  
126 media and centrifugation at 8000  $\times$  g for 5 min. Cells were frozen at -80°C and freeze-dried with  
127 CHRIST BETA 2-8 LSC plus with a LYO CUBE 4-8 freeze drier. Freeze-dried cells (100 mg) were  
128 extracted with 1 ml methanol and glass beads (0.5-mm glass beads, Scientific Industries Inc, USA)  
129 using a FastPrep cell disrupter two times for 25 s at a speed of 6.5 m/s. Samples were centrifuged  
130 at room temperature for 5 min at 10 000  $\times$  g. Supernatant was collected and extraction was  
131 repeated with 1 ml of methanol.

132

133 Extracts and purified scytocyclamide methanol solutions were analyzed with UPLC-QTOF (Acquity  
134 I-Class UPLC-SynaptG2-Si HR-MS, Waters Corp., Milford, MA, USA) equipped with a Kinetex  
135 C8 column (2.1  $\times$  50 or 100 mm, 1.7  $\mu\text{m}$ , 100 Å, Phenomenex, Torrance, CA, USA) injected with  
136 0.5 or 1  $\mu\text{l}$  samples, eluted at 40°C with 0.1 % HCOOH in water (solvent A) and  
137 acetonitrile/isopropanol (1:1, + 0.1 % HCOOH, solvent B) with a flow rate of 0.3 ml min<sup>-1</sup>. Two  
138 solvent gradients were used: 1, 5% B to 100% B in 5 min, maintained for 2 min, back to 5% B in  
139 0.50 min, and maintained for 2.50 min before next run; and 2, 10% B to 70% of B in 5 min, then to  
140 95% of B in 0.01 min, maintained for 1.99 min, then back to 10% of B in 0.5 min, and finally  
141 maintained for 2.5 min before the next run. QTOF was calibrated using sodium formate and  
142 Ultramark 1621, which yielded a calibrated mass range from  $m/z$  91 to 1921. Leucine Enkephalin  
143 was used at 10-s intervals as a lock mass reference compound. Mass spectral data were  
144 accumulated in positive electrospray ionization resolution mode. The MS<sup>E</sup> Trap Collision Energy  
145 Ramp Started from 40.0 eV and ended at 70.0 eV.

146

#### 147 **Bioactivity assays**

148

149 The same *S. hoffmannii* PCC 7110 methanol extract used for LC-MS was used for antimicrobial  
150 activity screening. The screening was performed with fungal and bacterial strains reported in Table  
151 2. The following samples were pipetted directly on spots on agar: 50  $\mu\text{l}$  cyanobacterial cellular  
152 methanol extract, 50  $\mu\text{l}$  negative control (methanol), and 10  $\mu\text{l}$  positive control (nystatin) (Nystatin,  
153 *Streptomyces noursei*, EMD Millipore Corp, Germany) solution 5 mg/ml in methanol for fungi and  
154 10  $\mu\text{l}$  ampicillin (Ampicillin sodium salt, Sigma, Israel) 50 mg/ml in 70% ethanol for bacteria.  
155 Solvents were allowed to evaporate, leaving the extracts diffused in the agar. Inocula were  
156 prepared by growing the fungi for 2-14 days on PDA (Potato Dextrose Agar) media at 28°C and  
157 bacteria for two days on BHI (Brain Heart Infusion) agar at 37°C. Cell mass was transferred with a  
158 cotton swab from the agar to 3 ml of sterile 5 M NaCl solution or sterile water in the case of *A.*  
159 *flavus*. The inocula were spread on the agar with cotton swabs. Fungal plates were incubated at  
160 28°C and bacterial plates at 37°C for 2 days and analyzed for inhibition zones.

161

162 The antifungal activity of purified scytocyclamide fractions dissolved in methanol were tested with  
163 *A. flavus* performed as with the cellular extract. Disc diffusion assays were performed with purified  
164 scytocyclamides. Paper discs (Blank monodiscs, Abtek biologicals Ltd, UK) were prepared with

165 methanol solutions of the peptides, methanol as a negative control, and nystatin as a positive  
166 control. *A. flavus* inoculum was prepared as previously and spread on the plate. Disks were placed  
167 on agar and the plates were incubated at 28°C for 2 days and analyzed.

### 168 169 **Biosynthetic gene cluster analysis**

170  
171 The *S. hofmannii* PCC 7110 draft genome sequence (ANNX02) was analyzed with AntiSMASH 4.1  
172 (Blin et al., 2017) to identify the scytocyclamide biosynthetic gene cluster. AntiSMASH recognized  
173 9 NRPS/PKS coding regions in the draft genome. The NRPS gene domain organization was  
174 compared to the scytocyclamide structure and neighboring candidate pathways for scytocyclamide  
175 biosynthesis were identified. Flanking genes with the same orientation to the NRPSs were included  
176 in the candidate cluster between 3,716,086- 3,812,822 bp. The cluster is limited from both sides by  
177 genes with opposite orientation. Adenylation domain substrate specificity prediction was performed  
178 by combining differing AntiSMASH 4.1 and AntiSMASH 5.1.2 (Blin et al., 2019) results. The  
179 scytocyclamide biosynthetic gene cluster was visualized using Artemis (Rutherford et al., 2000)  
180 and functional annotations (Table S1) were manually refined using a combination of BLASTp and  
181 CDD database searches.

182  
183 The condensation domain of NRPS module LxaC<sub>3</sub> was analyzed with Natural Product Domain  
184 Seeker NaPDos (Ziemert et al., 2012) to study the role of the condensation domain in Dhb  
185 modification. The phylogenetic comparison was made with condensation domains with a similar  
186 position to Dhb in hassallidin biosynthesis (Vestola et al., 2014) and nodularin biosynthesis (Jokela  
187 et al., 2017) with the condensation domains of HasO<sub>2</sub> and NdaA<sub>1</sub>, respectively.

## 188 189 **Results**

### 190 191 **Structure of scytocyclamides**

192  
193 UPLC-QTOF analysis of *S. hofmannii* PCC 7110 methanol extract yielded six peaks corresponding  
194 scytocyclamide variants (Figure S1, Figure S2). Three of these (scytocyclamides A-C) have been  
195 previously characterized with spectrometric methods, including NMR. Three new less abundant  
196 variants, scytocyclamides A2, B2, and B3 appeared to be less hydroxylated (Figure 1, Table 3).  
197 The protonated masses and relative intensities for each compound are shown in Table 4. Product  
198 ion spectra (MS<sup>E</sup>) of protonated scytocyclamides A-C showed that the amino acid sequence could  
199 be generated from high-intensity ions in which proline is N-terminal (Figure S3, S4). Application of  
200 this fragmentation behavior to product ion spectra (MS<sup>E</sup>) of the new scytocyclamides A2, B2, and  
201 B3 clearly showed the amino acids lacking a hydroxyl group (Figure S3, S4). Scytocyclamides A  
202 and A2 fall in 11-residue laxaphycins and scytocyclamides B-C fall in 12-residue laxaphycins. The  
203 yields for each compound were 1 mg (A), 1 mg (A2), 3 mg (B), 0.8 mg (C), 0.4 mg (B2), and 0.4  
204 mg (B3).

### 205 206 **Scytocyclamide biosynthetic gene cluster**

207  
208 Analysis of the public 12.3-Mb draft genome of *S. hofmannii* PCC 7110 identified 15 putative  
209 NRPS/PKS pathways in 9 regions recognized by AntiSMASH. Two sets of NRPSs with domain  
210 architecture matching the amino acid sequences of the two scytocyclamide types were found,  
211 separated from each other by only 5 ORFs in a 9-kb region in between them (Figure 2). Only a  
212 single pathway candidate for the initiation of the biosynthetic pathway with the fatty acid  
213 incorporation was found clustered with the NRPS genes (Figure 2). Both types of scytocyclamides  
214 contain β-aminooctanoic acid (Aoa) in their structures, and we predict that the two compounds  
215 share the initiating biosynthetic genes and pathway for the production of Aoa. The 96-kb  
216 biosynthetic gene cluster has 13 reading frames that were annotated *lxaA-H*, *lxbA-D*, and ORF1  
217 (Figure 2, Table S1).

218



219 The predicted biosynthesis of both scytocyclamide types is initiated by the LxA enzyme  
220 containing FAAL and ACP domains and is predicted to activate and load a hexanoic acid (Figure  
221 2). The hexyl group is forwarded to the PKS enzymes LxB and LxE (Figure 2). LxB contains a  
222 single ketosynthase (KS) domain and LxE is composed of acyl transferase (AT), ACP, and  
223 aminotransferase (AMT) domains (Figure 2). These PKS domains elongate the hexyl chain with  
224 one acyl group to octyl chain and the aminotransferase acts on the carbonyl in the  $\beta$  position  
225 adding the amino group (Figure 2). We predict that  $\beta$ -aminooctanoic acid has two alternative  
226 branched pathways, the 11- or 12-residue scytocyclamide NRPSs (Figure 2). In 11-residue  
227 scytocyclamide synthesis the LxC-D NRPSs and in 12-residue scytocyclamides the LxA-D  
228 NRPS enzymes incorporate the amino acids (Figure 2). Both pathways have a terminal  
229 thioesterase (TE) that head-to-tail cyclize the compound. Each module of LxC-D and LxB-A-D  
230 enzymes bears a condensation (C), adenylation (A), and thiolation (T) domain (Figure 2). In  
231 addition, LxC<sub>5</sub>, LxC<sub>6</sub>, LxD<sub>2</sub> and LxB<sub>2</sub>, LxB<sub>1</sub>, LxB<sub>3</sub>, and LxB<sub>4</sub> modules contain epimerase  
232 domains and LxB<sub>3</sub> contains a N-methylation domain (Figure 2). LxH is an ABC-transporter  
233 characteristic to NRPS gene clusters.

234  
235 The predicted adenylation domain substrate specificities of LxC-D and LxB-A-D match with the  
236 amino acids incorporated to scytocyclamides (Table S2) with some modifications. The  
237 scytocyclamide chemical structures contain 3-OHLeu, 3-OHAsn, 4-OHPro, and Dhb (Table 3).  
238 Scytocyclamide chemical variants with hydroxylations are the most abundant products produced  
239 by *S. hofmannii* PCC 7110 (Table 4). The leucine-binding pockets are identical (DAWFLGNVVK)  
240 for all four scytocyclamide leucins (position 10 in 11-residue scytocyclamides and positions 3, 5,  
241 and 11 in 12-residue scytocyclamides) with the possible exception of a gap in sequence of position  
242 3 (---FLGNVVK) (Table S2). Cultivation of *S. hofmannii* PCC 7110 in modified growth medium  
243 containing racemic 3-OHLeu did not result in an increase of the relative amounts of hydroxylated  
244 leucine-containing laxaphycin variants (Figure S5). This could indicate that LxB<sub>2</sub> and LxB<sub>1</sub>  
245 adenylation domains incorporate Leu and not 3-OHLeu, assuming that 3-OHLeu is taken up by the  
246 cell. *S. hofmannii* PCC 7110 incorporated the non-proteinogenic amino acids (2S,4R)-MePro,  
247 (2R,4R)-MePro, (2S,4S)-MePro, (2S,4S)-OHPro, and (2S,4R)-4-OHPro in parallel cultivation  
248 experiments (data not shown). We predict that the cupin 8 family proteins LxF-G hydroxylate the  
249 leucines and the asparagine after incorporation of the proteinogenic amino acids (Figure 2). We did  
250 not find suitable candidate enzymes for modification of hydroxyproline encoded in the BGC.

251  
252 Phylogenetic analysis of the Dhb-tailoring related condensation domains LxC<sub>4</sub>, HasO<sub>2</sub>, and NdaA<sub>1</sub>  
253 with NaPDoS resulted in all of the submitted sequences having the highest identity with the  
254 modified AA clade of condensation domains (Figure S6). The modified AA clade of condensation  
255 domains have been proposed to have an active role in threonine dehydration in NRPS synthesis  
256 and our result supports this proposal

## 257 258 **Antimicrobial activity**

259  
260 Methanol extracts of *S. hofmannii* PCC 7110 inhibited the growth of *A. flavus* FBCC 2467. Disc  
261 diffusion assays were performed after purification of the scytocyclamides from the extract.  
262 Inhibition of fungal growth was observed with individual scytocyclamides as a hazy inhibition zone  
263 and synergy was observed between 11-residue and 12-residue compounds as a noticeably  
264 increased clear inhibition zone (Figure 3). Scytocyclamide amounts and inhibition zone diameters  
265 are shown in Table S3. Cross-contamination between purified scytocyclamides A-D was from <1%  
266 to 5 % and 15% for E (Figure S7).  
267

## 268 Discussion

269

270 We described an unusual natural product biosynthetic gene cluster for producing structurally  
271 distinct scytocyclamides. Our analysis suggests that scytocyclamides have branched biosynthesis  
272 due to the shared loading modules LxA-A-B and LxA-E (Figure 2, Table S1). These shared loading  
273 modules initiate the biosynthesis with the  $\beta$ -amino acid Aoa, which is the only common amino acid  
274 in the peptide sequence of the two types of scytocyclamides. The biosynthesis then branches to  
275 two NRPS pathways (Figure 2). The organization of the catalytic domains in the NRPS enzymes  
276 LxA-C-D matches the structure of 11-residue scytocyclamides A and A2 and NRPSs LxB-A-D match  
277 the structure of 12-residue scytocyclamides B, B2, B3, and C (Figure 2), as analyzed in this study  
278 and reported earlier (Grewe, 2005). This kind of branching is exceptional to natural product  
279 biosynthetic gene clusters that are typically self-contained and act independently following the co-  
280 linearity rule of PKS/NRPS biosynthesis (Guenzi et al., 1998; Callahan et al., 2009; Baral et al.,  
281 2018). However, there are exceptions to this rule. Encoding genes are not always in a successive  
282 order (Mootz et al., 2002; Callahan et al., 2009). Modules can be skipped, as in the case of  
283 anabaenopeptin and namalide synthesis in *Nostoc* sp. CENA543, where the two compounds are  
284 produced by the same gene cluster, but a shorter product namalide is produced when three  
285 modules are skipped (Shishido et al., 2017). For example, PKS domain skipping occurs in the  
286 synthesis of leinamycin (Tang et al., 2006). Alternative starter modules have been found in the  
287 synthesis of anabaenopeptins (Rouhiainen et al., 2010) and puwainaphycins and minutissamides  
288 (Mareš et al., 2019). Gene clusters have also been shown to share enzymes in producing non-  
289 proteinogenic amino acids as in the case of anabaenopeptin and spumigin (Lima et al., 2017) and  
290 aeruginosin and spumigin, which results in the side product pseudoaeruginosin (Liu et al., 2015).  
291 Crosstalk between NRPS clusters has also been found in erythrochelin biosynthesis with two  
292 separate clusters sharing essential biosynthetic enzymes (Lazos et al., 2010). Some NRPSs  
293 incorporate multiple residues of the same amino acid iteratively, as in enterobactin synthesis  
294 (Shaw-Reid et al., 1999). Laxaphycin biosynthesis shared loading modules are now presented as a  
295 new exception to the colinearity rule of NRPS/PKS synthesis.

296

297 Twelve-residue scytocyclamides have hydroxylated Leu in positions 3 and 5 and hydroxylated Asn  
298 in position 8. However, the adenylation domain substrate specificity predictions are for  
299 proteinogenic Leu and Asn with a 100% match. We propose that the proteinogenic amino acids act  
300 as substrates for the NRPS enzymes. In the case of OHLeu and OHAsn, the modifications occur  
301 after peptide-bond formation events. We propose that the hydroxylation of these Leu and Asn  
302 residues in all laxaphycins is performed by cupin 8-like proteins of the gene cluster. The JmjC-like  
303 cupin 8 family (pfam13621) of proteins are Fe(II) or Zn(II) and  $\alpha$ -ketoglutarate ( $\alpha$ -KG) dependent  
304 oxygenases and act as hydroxylases and demethylases (Hewitson et al., 2002; Markolovic et al.,  
305 2016). The enzymes working as demethylases first catalyze a hydroxylation followed by  
306 fragmentation to produce a demethylated product and formaldehyde. There are examples of  
307 hydroxylation of asparagine, aspartate, histidine, lysine, arginine, and RNA in human and animal  
308 proteins (Wilkins et al., 2018). The activity of cupin 8 is specific to the amino acid position in the  
309 peptide. The location within the supercluster suggests function in the biosynthesis of the product.  
310 To our knowledge, this kind of function of cupin 8 proteins has not been previously characterized in  
311 NRPS products. The hydroxylated amino acids occur in modules with epimerase domains. This  
312 suggests that the enzymes hydroxylating the residues are specific to D-amino acids or the  
313 epimerase domains have a role in the hydroxylation. Other mechanisms have previously been  
314 found to introduce 3-hydroxylated amino acids to NRPS products (Hou et al., 2011).  $\alpha$ -KG-  
315 dependent oxygenases hydroxylate L-arginine in viomycin (Yin and Zabriskie, 2004), L-asparagine  
316 in daptomycin-like peptide (Strieker et al., 2007), and D-glutamine in kutzneride (Strieker et al.,  
317 2009) biosyntheses. No homologs to these enzymes were found near the scytocyclamide cluster.

318

319 Dhb is enzymatically produced from threonine recognized by the adenylation domain (Challis et al.,  
320 2000). In the case of microcystin and nodularin synthesis, the dehydration has been proposed to  
321 occur due to the active role of the following condensation domain in the process (Tillett et al., 2000;  
322 Moffitt and Neilan, 2004) and bleomycin synthesis (Du et al., 2000). These microcystin and

323 bleomycin condensation domains have been assigned to their own clade of condensation domains  
324 as “modified AA” C-domains (Ziemert et al., 2012; Bloudoff and Schmeing, 2017). When the LxaC<sub>3</sub>  
325 condensation domain was analyzed by NaPDoS, it grouped with these modified AA condensation  
326 domains. The similarity of these domains with direct contact to the modified amino acid suggests  
327 that the Dhb and Dha dehydration could be indeed catalyzed by the condensation domains in  
328 these cases. For the homoserine residues, no prediction was given by AntiSMASH 5.1. However, a  
329 previous version, antiSMASH 4.1.0, did recognize the corresponding binding pocket sequence for  
330 DLKNFGSDVK as homoserine based on the Stachelhaus code. Homoserine as an amino acid in  
331 NRPS products is less common and in cyanobacteria has been previously seen in laxaphycin  
332 family peptides and nostocyclopeptide M1 (Jokela et al., 2010). However, the biosynthesis and  
333 adenylation domains for this product have not been published. Hydroxyproline has been found in  
334 other cyanobacterial natural products, such as nostoweipeptins W1-W7 and nostopeptolides L1-L4  
335 (Liu et al., 2014). The process of incorporating the hydroxyproline or hydroxylating the prolyl  
336 residue remain unclear.

337  
338 The catalytic domain organization of the scytocyclamide gene cluster matches the laxaphycin  
339 family compound structures reported earlier. The epimerizations are conserved in 11-residue  
340 laxaphycins in positions 6, 7, and 9 and in 12-residue laxaphycins in positions 3, 5, 8, and 11. The  
341 N-methylation of the amino acid in position 7 of the 12-residue laxaphycins is also conserved. Dhb<sup>3</sup>  
342 is conserved in the structures of 11-residue laxaphycins. The 3-OHLeu<sup>3</sup> is conserved in 12-residue  
343 laxaphycins and 3-OHLeu<sup>5</sup> and OHAsn<sup>8</sup> are common in 12-residue laxaphycins (Table 1).  
344 Bornancin et al. (2019) predicted that laxaphycin gene clusters should have FAAL and PKS  
345 modules to initiate biosynthesis, because the 11-residue acyclic acyclolaxaphycins have a break  
346 just before the Aoc and cyclization would be the last step of synthesis. Bornancin et al. (2015)  
347 found acyclic 11-residue laxaphycin variants with a gap between the second and third amino acid  
348 in sequence starting with the Adc. They proposed that this gap could be where the synthesis is  
349 finished and the cyclization occurs, or that the compounds they found were cleaved by  
350 environmental agents. Our results confirm the discovered acyclic 11-residue variants could be  
351 immature products of the pathway, as the linear peptide follows the biosynthetic organization we  
352 have described. With the acyclic 12-residue variants, the gap in the sequence occurs within a  
353 predicted NRPS gene and the proposed mechanism of other agents or enzymes in the  
354 environment cleaving the products would seem more reasonable.

355  
356 Cyanobacteria are abundant primary producers in aquatic environments and are targeted to  
357 grazing by higher organisms, such as sea hares (Cruz-Rivera and Paul, 2007). Cyanobacteria  
358 produce a wide range of bioactive natural products (Dittmann et al., 2015; Demay et al., 2019) that  
359 seem to be produced to deter the grazing fauna in the environment (Leão et al., 2012; Mazard et  
360 al., 2016). Potential competitors to cyanobacteria are also other microbes such as chytrids, which  
361 are fungi parasitic to cyanobacteria (Agha et al., 2018). Some cyanobacterial natural products have  
362 reached clinical trials and are approved as cancer drugs (Luesch et al., 2001; Deng et al., 2013).  
363 Cyclic lipopeptides are common among the cyanobacterial natural products and typically contain a  
364 single fatty acid as in laxaphycins (Galica et al., 2017) that confers membrane-disruptive properties  
365 (Humisto et al., 2019). Laxaphycin family peptides have been shown to be toxic to or inhibit the  
366 growth of multiple organisms and cell lines (Gerwick et al., 1989; Frankmölle et al., 1992b;  
367 Bonnard et al., 1997; MacMillan et al., 2002; Bonnard et al., 2007; Maru et al., 2010; Luo et al.,  
368 2014; Luo et al., 2015; Dussault et al., 2016; Cai et al., 2018; Bornancin et al., 2019). We observed  
369 antifungal activity of scytocyclamides towards *A. flavus* (Figure 3, Table S3). In an earlier report by  
370 Grewe (2005), no activity against *C. albicans* was detected for scytocyclamides A, B, and C, which  
371 was also observed in this study. Synergistic antifungal activity between 11- and 12-residue  
372 laxaphycins has been previously reported (Frankmölle et al., 1992b; MacMillan et al., 2002). The  
373 same synergistic activity was observed between 11- and 12-residue scytocyclamides (Figure 3,  
374 Table S3). According to previous studies and our results, the 12-residue laxaphycins are typically  
375 more potent on their own than 11-residue laxaphycins. Our previous study on *S. hofmannii* PCC  
376 7110 failed to identify the antifungal agent in the extract, when purified fractions lacked activity. We  
377 now conclude that the antifungal activity was most probably caused by scytocyclamides, but the

378 purified fractions had insufficient amounts of material to produce the inhibitory effect without a  
379 synergistic partner (Shishido et al., 2015).

380

381 It is probable that the other type of laxaphycins originally existed without a synergistic partner  
382 peptide in the cells, as many laxaphycins have antimicrobial activity by themselves. Through  
383 recombination events, a synergistically acting peptide has emerged to enhance the activity of the  
384 original peptide. One possibility is that the two peptides had individual gene clusters, but the  
385 initiating enzymes have been subject to an elimination event when two distinct starter enzymes  
386 were no longer necessary. It is clear that the synergistic bioactivity and shared biosynthesis of  
387 laxaphycins go together. Similar colocalization with coregulation of distinct synergistic biosynthetic  
388 gene clusters has been previously observed in the streptomycetal antibiotics griseoviridin and  
389 viridogrisein (Xie et al., 2012). The mechanism behind the synergistic action is usually two different  
390 compounds acting on two different targets, thus combining their activity (Caesar and Cech, 2019).  
391 It is possible that one compound makes the target cell vulnerable to the other, such as via damage  
392 to the cell wall. The colocalization of genes and shared biosynthesis suggest simultaneous  
393 regulation and expression of the synergistic products to act on a single cellular target through  
394 different mechanisms.

395

#### 396 **Author Contributions**

397 LMPH, KS, JJ, MW, and DPF designed the study.

398 AJ, LMPH, and MW performed the experiments.

399 LMPH, JJ, and DPF analyzed and interpreted the data.

400 LMPH, DPF, JJ, and KS wrote the manuscript, which was corrected, revised, and approved by all  
401 authors.

402

#### 403 **Funding**

404 This work was supported by a grant awarded to KS from the Jane and Aatos Erkkö Foundation.

405

#### 406 **Conflict of Interest Statement**

407 The authors declare that the research was conducted in the absence of any commercial or  
408 financial relationships that could be construed as a potential conflict of interest.

409

#### 410 **Acknowledgments**

411 The authors thank Lyudmila Saari for maintaining the cyanobacterial strain retrieved from The  
412 Pasteur Culture Collection of Cyanobacteria.

413

#### 414 **References**

415

416 Baral, B., Akhgari, A., and Metsä-Ketelä, M. (2018). Activation of microbial secondary metabolic  
417 pathways: Avenues and challenges. *Synth Syst Biotechnol* 3(3), 163-178. doi:  
418 10.1016/j.synbio.2018.09.001.

419 Blin, K., Shaw, S., Steinke, K., Villebro, R., Ziemert, N., Lee, S.Y., et al. (2019). antiSMASH 5.0:  
420 updates to the secondary metabolite genome mining pipeline. 47(W1), W81-W87. doi:  
421 10.1093/nar/gkz310.

422 Blin, K., Wolf, T., Chevrette, M.G., Lu, X.W., Schwalen, C.J., Kautsar, S.A., et al. (2017).  
423 antiSMASH 4.0-improvements in chemistry prediction and gene cluster boundary  
424 identification. *Nucleic Acids Res.* 45(W1), W36-W41. doi: 10.1093/nar/gkx319.

425 Bloudoff, K., and Schmeing, T.M. (2017). Structural and functional aspects of the nonribosomal  
426 peptide synthetase condensation domain superfamily: discovery, dissection and diversity.  
427 1865(11, Part B), 1587-1604. doi: 10.1016/j.bbapap.2017.05.010.

428 Bonnard, I., Rolland, M., Francisco, C., and Banaigs, B. (1997). Total structure and biological  
429 properties of laxaphycins A and B, cyclic lipopeptides from the marine cyanobacterium  
430 *Lyngbya majuscula*. *Lett. Pept. Sci.* 4(4-6), 289-292. doi: 10.1007/bf02442891.



- 431 Bonnard, I., Rolland, M., Salmon, J.M., Debiton, E., Barthomeuf, C., and Banaigs, B. (2007). Total  
432 structure and inhibition of tumor cell proliferation of laxaphycins. 50(6), 1266-1279. doi:  
433 10.1021/jm061307x.
- 434 Bornancin, L., Alonso, E., Alvarino, R., Inguibert, N., Bonnard, I., Botana, L.M., et al. (2019).  
435 Structure and biological evaluation of new cyclic and acyclic laxaphycin-A type peptides.  
436 *Bioorg. Med. Chem.* 27(10), 1966-1980. doi: 10.1016/j.bmc.2019.03.046.
- 437 Bornancin, L., Boyaud, F., Mahiout, Z., Bonnard, I., Mills, S.C., Banaigs, B., et al. (2015). Isolation  
438 and Synthesis of Laxaphycin B-Type Peptides: A Case Study and Clues to Their  
439 Biosynthesis. *Mar. Drugs* 13(12), 7285-7300. doi: 10.3390/md13127065.
- 440 Caesar, L.K., and Cech, N.B. (2019). Synergy and antagonism in natural product extracts: when  
441 1+1 does not equal 2. *Nat. Prod. Rep.* 36(6), 869-888. doi: 10.1039/c9np00011a.
- 442 Cai, W.J., Matthew, S., Chen, Q.Y., Paul, V.J., and Luesch, H. (2018). Discovery of new A- and B-  
443 type laxaphycins with synergistic anticancer activity. *Bioorg. Med. Chem.* 26(9), 2310-2319.  
444 doi: 10.1016/j.bmc.2018.03.022.
- 445 Callahan, B., Thattai, M., and Shraiman, B.I. (2009). Emergent gene order in a model of modular  
446 polyketide synthases. *Proc Natl Acad Sci U S A* 106(46), 19410-19415. doi:  
447 10.1073/pnas.0902364106.
- 448 Challis, G.L., Ravel, J., and Townsend, C.A. (2000). Predictive, structure-based model of amino  
449 acid recognition by nonribosomal peptide synthetase adenylation domains. 7(3), 211-224.  
450 doi: 10.1016/S1074-5521(00)00091-0.
- 451 Demay, J., Bernard, C., Reinhardt, A., and Marie, B. (2019). Natural Products from Cyanobacteria:  
452 Focus on Beneficial Activities. *Mar. Drugs* 17(6), 49. doi: 10.3390/md17060320.
- 453 Deng, C., Pan, B., and O'Connor, O.A. (2013). Brentuximab Vedotin. *Clin Cancer Res* 19(1), 22-  
454 27. doi: 10.1158/1078-0432.CCR-12-0290
- 455 Dittmann, E., Gugger, M., Sivonen, K., and Fewer, D.P. (2015). Natural Product Biosynthetic  
456 Diversity and Comparative Genomics of the Cyanobacteria. 23(10), 642-652. doi:  
457 10.1016/j.tim.2015.07.008.
- 458 Du, L., Sánchez, C., Chen, M., Edwards, D.J., and Shen, B. (2000). The biosynthetic gene cluster  
459 for the antitumor drug bleomycin from *Streptomyces verticillus* ATCC15003 supporting  
460 functional interactions between nonribosomal peptide synthetases and a polyketide  
461 synthase. 7(8), 623-642. doi: 10.1016/S1074-5521(00)00011-9.
- 462 Dussault, D., Vu, K.D., Vansach, T., Horgen, F.D., and Lacroix, M. (2016). Antimicrobial effects of  
463 marine algal extracts and cyanobacterial pure compounds against five foodborne  
464 pathogens. 199, 114-118. doi: 10.1016/j.foodchem.2015.11.119.
- 465 Evans, B.S., Robinson, S.J., and Kelleher, N.L. (2011). Surveys of non-ribosomal peptide and  
466 polyketide assembly lines in fungi and prospects for their analysis in vitro and in vivo.  
467 *Fungal Genet Biol* 48(1), 49-61. doi: 10.1016/j.fgb.2010.06.012.
- 468 Frankmölle, W.P., Knubel, G., Moore, R.E., and Patterson, G.M.L. (1992a). Antifungal cyclic  
469 peptides from the terrestrial blue-green alga *Anabaena laxa*. 2. Structures of laxaphycin A,  
470 laxaphycin B, laxaphycin D and laxaphycin E 45(9), 1458-1466. doi:  
471 10.7164/antibiotics.45.1458.
- 472 Frankmölle, W.P., Larsen, L.K., Caplan, F.R., Patterson, G.M.L., Knubel, G., Levine, I.A., et al.  
473 (1992b). Antifungal cyclic peptides from the terrestrial blue-green alga *Anabaena laxa*. 1.  
474 Isolation and biological properties. 45(9), 1451-1457. doi: 10.7164/antibiotics.45.1451.
- 475 Galica, T., Hrouzek, P., and Mares, J. (2017). Genome mining reveals high incidence of putative  
476 lipopeptide biosynthesis NRPS/PKS clusters containing fatty acyl-AMP ligase genes in  
477 biofilm-forming cyanobacteria. *Journal of phycology* 53(5), 985-998. doi:  
478 10.1111/jpy.12555.
- 479 Gerwick, W.H., Mrozek, C., Moghaddam, M.F., and Agarwal, S.K. (1989). Novel cytotoxic peptides  
480 from the tropical marine cyanobacterium *Hormothamnion enteromorphoides* 1. Discovery,  
481 isolation and initial chemical and biological characterization of the hormothamnins from wild  
482 and cultured material. 45(2), 115-121. doi: 10.1007/BF01954842.
- 483 Grewe, J.C. (2005). Cyanopeptoline und Scytocyclamide: Zyklische Peptide aus *Scytonema*  
484 *hofmanni* PCC 7110 Struktur und biologische Aktivität. [dissertation/doctoral thesis].  
485 [Freiburg im Breisgau (BW)]: Albert-Ludwigs-Universität Freiburg im Breisgau

- 486 Guenzi, E., Galli, G., Grgurina, I., Pace, E., Ferranti, P., and Grandi, G. (1998). Coordinate  
487 transcription and physical linkage of domains in surfactin synthetase are not essential for  
488 proper assembly and activity of the multienzyme complex. *273*(23), 14403-14410. doi:  
489 10.1074/jbc.273.23.14403.
- 490 Hewitson, K.S., McNeill, L.A., Riordan, M.V., Tian, Y.M., Bullock, A.N., Welford, R.W., et al. (2002).  
491 Hypoxia-inducible factor (HIF) asparagine hydroxylase is identical to factor inhibiting HIF  
492 (FIH) and is related to the cupin structural family. *J. Biol. Chem.* *277*(29), 26351-26355. doi:  
493 10.1074/jbc.C200273200.
- 494 Hou, J., Robbel, L., and Marahiel, Mohamed A. (2011). Identification and Characterization of the  
495 Lysobactin Biosynthetic Gene Cluster Reveals Mechanistic Insights into an Unusual  
496 Termination Module Architecture. *18*(5), 655-664. doi: 10.1016/j.chembiol.2011.02.012.
- 497 Huang, I.S., and Zimba, P.V. (2019). Cyanobacterial bioactive metabolites-A review of their  
498 chemistry and biology. *83*, 42-94. doi: 10.1016/j.hal.2018.11.008.
- 499 Humisto, A., Jokela, J., Teigen, K., Wahlsten, M., Permi, P., Sivonen, K., et al. (2019).  
500 Characterization of the interaction of the antifungal and cytotoxic cyclic glycolipopeptide  
501 hassallidin with sterol-containing lipid membranes. *1861*(8), 1510-1521. doi:  
502 10.1016/j.bbamem.2019.03.010.
- 503 Jokela, J., Heinilä, L.M.P., Shishido, T.K., Wahlsten, M., Fewer, D.P., Fiore, M.F., et al. (2017).  
504 Production of High Amounts of Hepatotoxin Nodularin and New Protease Inhibitors  
505 Pseudospumigins by the Brazilian Benthic *Nostoc* sp. CENA543. *Front. Microbiol.* *8*, 14.  
506 doi: 10.3389/fmicb.2017.01963.
- 507 Jokela, J., Herfindal, L., Wahlsten, M., Permi, P., Selheim, F., Vasconcelos, V., et al. (2010). A  
508 Novel Cyanobacterial Nostocyclopeptide is a Potent Antitoxin against Microcystins.  
509 *ChemBioChem* *11*(11), 1594-1599. doi: 10.1002/cbic.201000179.
- 510 Kehr, J.-C., Gatte Picchi, D., and Dittmann, E. (2011). Natural product biosyntheses in  
511 cyanobacteria: A treasure trove of unique enzymes. *Beilstein J Org Chem* *7*, 1622-1635.  
512 doi: 10.3762/bjoc.7.191.
- 513 Kim, E., Moore, B.S., and Yoon, Y.J. (2015). Reinvigorating natural product combinatorial  
514 biosynthesis with synthetic biology. *11*(9), 649-659. doi: 10.1038/nchembio.1893.
- 515 Lazos, O., Tosin, M., Slusarczyk, A.L., Boakes, S., Cortés, J., Sidebottom, P.J., et al. (2010).  
516 Biosynthesis of the Putative Siderophore Erythrochelin Requires Unprecedented Crosstalk  
517 between Separate Nonribosomal Peptide Gene Clusters. *17*(2), 160-173. doi:  
518 10.1016/j.chembiol.2010.01.011.
- 519 Lima, S.T., Alvarenga, D.O., Etcheagaray, A., Fewer, D.P., Jokela, J., Varani, A.M., et al. (2017).  
520 Genetic Organization of Anabaenopeptin and Spumigin Biosynthetic Gene Clusters in the  
521 Cyanobacterium *Sphaerospermopsis torques-reginae* ITEP-024. *12*(3), 769-778. doi:  
522 10.1021/acschembio.6b00948.
- 523 Liu, L., Budnjo, A., Jokela, J., Haug, B.E., Fewer, D.P., Wahlsten, M., et al. (2015).  
524 Pseudoaeruginosins, Nonribosomal Peptides in *Nodularia spumigena*. *10*(3), 725-733. doi:  
525 10.1021/cb5004306.
- 526 Liu, L.W., Jokela, J., Herfindal, L., Wahlsten, M., Sinkkonen, J., Permi, P., et al. (2014). 4-  
527 Methylproline Guided Natural Product Discovery: Co-Occurrence of 4-Hydroxy- and 4-  
528 Methylprolines in Nostoweipeptins and Nostopeptolides. *ACS Chem. Biol.* *9*(11), 2646-  
529 2655. doi: 10.1021/cb500436p.
- 530 Luesch, H., Yoshida, W.Y., Moore, R.E., Paul, V.J., and Corbett, T.H. (2001). Total Structure  
531 Determination of Apratoxin A, a Potent Novel Cytotoxin from the Marine Cyanobacterium  
532 *Lyngbya majuscula*. *123*(23), 5418-5423. doi: 10.1021/ja010453j.
- 533 Luo, S.W., Kang, H.S., Kronic, A., Chen, W.L., Yang, J.L., Woodard, J.L., et al. (2015).  
534 Trichormamides C and D, antiproliferative cyclic lipopeptides from the cultured freshwater  
535 cyanobacterium cf. *Oscillatoria* sp. UIC 10045. *Bioorg. Med. Chem.* *23*(13), 3153-3162. doi:  
536 10.1016/j.bmc.2015.04.073.
- 537 Luo, S.W., Kronic, A., Kang, H.S., Chen, W.L., Woodard, J.L., Fuchs, J.R., et al. (2014).  
538 Trichormamides A and B with Antiproliferative Activity from the Cultured Freshwater  
539 Cyanobacterium *Trichormus* sp. UIC 10339. *J. Nat. Prod.* *77*(8), 1871-1880. doi:  
540 10.1021/np5003548.

- 541 MacMillan, J.B., Ernst-Russell, M.A., de Ropp, J.S., and Molinski, T.F. (2002). Lobocyclamides A-  
542 C, lipopeptides from a cryptic cyanobacterial mat containing *Lyngbya confervoides*. *J. Org.*  
543 *Chem.* 67(23), 8210-8215. doi: 10.1021/jo0261909.
- 544 Mareš, J., Hájek, J., Urajová, P., Kust, A., Jokela, J., Saurav, K., et al. (2019). Alternative  
545 Biosynthetic Starter Units Enhance the Structural Diversity of Cyanobacterial Lipopeptides.  
546 85(4), e02675-02618. doi: 10.1128/AEM.02675-18.
- 547 Markolovic, S., Leissing, T.M., Chowdhury, R., Wilkins, S.E., Lu, X., and Schofield, C.J. (2016).  
548 Structure-function relationships of human JmjC oxygenases - demethylases versus  
549 hydroxylases. *Curr. Opin. Struct. Biol.* 41, 62-72. doi: 10.1016/j.sbi.2016.05.013.
- 550 Maru, N., Ohno, O., and Uemura, D. (2010). Lyngbyacyclamides A and B, novel cytotoxic peptides  
551 from marine cyanobacteria *Lyngbya* sp. *Tetrahedron Lett.* 51(49), 6384-6387. doi:  
552 10.1016/j.tetlet.2010.06.105.
- 553 Miyanaga, A., Kudo, F., and Eguchi, T. (2018). Protein-protein interactions in polyketide synthase-  
554 nonribosomal peptide synthetase hybrid assembly lines. 35(11), 1185-1209. doi:  
555 10.1039/C8NP00022K.
- 556 Moffitt, M.C., and Neilan, B.A. (2004). Characterization of the nodularin synthetase gene cluster  
557 and proposed theory of the evolution of cyanobacterial hepatotoxins. *Appl. Environ.*  
558 *Microbiol.* 70(11), 6353-6362. doi: 10.1128/aem.70.11.6353-6362.2004.
- 559 Mootz, H.D., Schwarzer, D., and Marahiel, M.A. (2002). Ways of Assembling Complex Natural  
560 Products on Modular Nonribosomal Peptide Synthetases. 3(6), 490-504. doi:  
561 10.1002/1439-7633(20020603)3:6<490::Aid-cbic490>3.0.Co;2-n.
- 562 Newman, D.J., and Cragg, G.M. (2016). Natural Products as Sources of New Drugs from 1981 to  
563 2014. 79(3), 629-661. doi: 10.1021/acs.jnatprod.5b01055.
- 564 Rodrigues, T., Reker, D., Schneider, P., and Schneider, G. (2016). Counting on natural products  
565 for drug design. 8(6), 531-541. doi: 10.1038/nchem.2479.
- 566 Rouhiainen, L., Jokela, J., Fewer, D.P., Urmann, M., and Sivonen, K. (2010). Two Alternative  
567 Starter Modules for the Non-Ribosomal Biosynthesis of Specific Anabaeno-peptin Variants  
568 in *Anabaena* (Cyanobacteria). 17(3), 265-273. doi: 10.1016/j.chembiol.2010.01.017.
- 569 Rutherford, K., Parkhill, J., Crook, J., Horsnell, T., Rice, P., Rajandream, M.A., et al. (2000).  
570 Artemis: sequence visualization and annotation. *Bioinformatics* 16(10), 944-945. doi:  
571 10.1093/bioinformatics/16.10.944.
- 572 Shaw-Reid, C.A., Kelleher, N.L., Losey, H.C., Gehring, A.M., Berg, C., and Walsh, C.T. (1999).  
573 Assembly line enzymology by multimodular nonribosomal peptide synthetases: the  
574 thioesterase domain of *E. coli* EntF catalyzes both elongation and cyclolactonization. 6(6),  
575 385-400. doi: 10.1016/S1074-5521(99)80050-7.
- 576 Shishido, T.K., Humisto, A., Jokela, J., Liu, L.W., Wahlsten, M., Tamrakar, A., et al. (2015).  
577 Antifungal Compounds from Cyanobacteria. *Mar. Drugs* 13(4), 2124-2140. doi:  
578 10.3390/md13042124.
- 579 Shishido, T.K., Jokela, J., Fewer, D.P., Wahlsten, M., Fiore, M.F., and Sivonen, K. (2017).  
580 Simultaneous Production of Anabaeno-peptides and Namalides by the Cyanobacterium  
581 *Nostoc* sp CENA543. *ACS Chem. Biol.* 12(11), 2746-2755. doi:  
582 10.1021/acscchembio.7b00570.
- 583 Spainhour, C.B. (2005). *Natural Products*.
- 584 Strieker, M., Kopp, F., Mahlert, C., Essen, L.-O., and Marahiel, M.A. (2007). Mechanistic and  
585 Structural Basis of Stereospecific C $\beta$ -Hydroxylation in Calcium-Dependent Antibiotic, a  
586 Daptomycin-Type Lipopeptide. 2(3), 187-196. doi: 10.1021/cb700012y.
- 587 Strieker, M., Nolan, E.M., Walsh, C.T., and Marahiel, M.A. (2009). Stereospecific Synthesis of  
588 threo- and erythro- $\beta$ -Hydroxyglutamic Acid During Kutzneride Biosynthesis. 131(37),  
589 13523-13530. doi: 10.1021/ja9054417.
- 590 Tang, G.-L., Cheng, Y.-Q., and Shen, B. (2006). Polyketide chain skipping mechanism in the  
591 biosynthesis of the hybrid nonribosomal peptide-polyketide antitumor antibiotic leinamycin  
592 in *Streptomyces atroolivaceus* S-140. *J Nat Prod* 69(3), 387-393. doi: 10.1021/np050467t.
- 593 Tillett, D., Dittmann, E., Erhard, M., von Dohren, H., Borner, T., and Neilan, B.A. (2000). Structural  
594 organization of microcystin biosynthesis in *Microcystis aeruginosa* PCC7806: an integrated

- 595 peptide-polyketide synthetase system. 7(10), 753-764. doi: 10.1016/s1074-5521(00)00021-  
596 1.
- 597 Vestola, J., Shishido, T.K., Jokela, J., Fewer, D.P., Aitio, O., Permi, P., et al. (2014). Hassallidins,  
598 antifungal glycolipopeptides, are widespread among cyanobacteria and are the end-product  
599 of a nonribosomal pathway. 111(18), E1909. doi: 10.1073/pnas.1320913111.
- 600 Wilkins, S.E., Islam, S., Gannon, J.M., Markolovic, S., Hopkinson, R.J., Ge, W., et al. (2018).  
601 JMJD5 is a human arginyl C-3 hydroxylase. *Nat. Commun.* 9, 12. doi: 10.1038/s41467-018-  
602 03410-w.
- 603 Xie, Y., Wang, B., Liu, J., Zhou, J., Ma, J., Huang, H., et al. (2012). Identification of the  
604 Biosynthetic Gene Cluster and Regulatory Cascade for the Synergistic Antibacterial  
605 Antibiotics Griseoviridin and Viridogrisein in *Streptomyces griseoviridis*. 13(18), 2745-2757.  
606 doi: 10.1002/cbic.201200584.
- 607 Yin, X., and Zabriskie, T.M. (2004). VioC is a Non-Heme Iron,  $\alpha$ -Ketoglutarate-Dependent  
608 Oxygenase that Catalyzes the Formation of 3S-Hydroxy-L-Arginine during Viomycin  
609 Biosynthesis. 5(9), 1274-1277. doi: 10.1002/cbic.200400082.
- 610 Ziemert, N., Podell, S., Penn, K., Badger, J.H., Allen, E., and Jensen, P.R. (2012). The Natural  
611 Product Domain Seeker NaPDoS: A Phylogeny Based Bioinformatic Tool to Classify  
612 Secondary Metabolite Gene Diversity. 7(3), e34064. doi: 10.1371/journal.pone.0034064.

## Figure legends

- 614  
615  
616 Figure 1. Structures of 11- and 12-residue laxaphycin variants scytocyclamides.  
617 Figure 2. The scytocyclamide (*Ixa* and *Ixb*) biosynthetic gene cluster and putative biosynthetic  
618 scheme. A: Organization of predicted scytocyclamide biosynthetic genes. B: Proposed biosynthetic  
619 pathway of scytocyclamides. NRPS Non-ribosomal peptide synthetase, PKS Polyketide synthase,  
620 FAAL Fatty acyl AMP Ligase, ACP acyl carrier protein, KS ketosynthase, AT acyltransferase, AMT  
621 aminotransferase, C condensation domain, A adenylation domain, T thiolation domain, M  
622 methylation domain, TE thioesterase domain.  
623 Figure 3. Inhibition of growth of *Aspergillus flavus* by scytocyclamides. Scytocyclamide A2 (200  
624  $\mu$ g), scytocyclamide B2 (85  $\mu$ g), and scytocyclamides A2+B2 (100  $\mu$ g + 43  $\mu$ g). Disc diameter is 5  
625 mm.

## Tables

627  
628  
629 Table 1. Amino acid sequence of laxaphycin variants.

| 7                                                                   | Amino acid residue |     |     |       |     |     |     |     |        |        |        | Ref. |
|---------------------------------------------------------------------|--------------------|-----|-----|-------|-----|-----|-----|-----|--------|--------|--------|------|
|                                                                     | 1                  | 2   | 3   | 4     | 5   | 6   | 7   | 8   | 9      | 10     | 11     |      |
| 11-residue laxaphycins                                              |                    |     |     |       |     |     |     |     |        |        |        |      |
| Laxaphycin A                                                        | Aoa                | Hse | Dhb | OHPro | HSe | Phe | Leu | Ile | Ile    | Leu    | Gly    | 1    |
| Laxaphycin A2                                                       | Aoa                | Hse | Dhb | OHPro | HSe | Phe | Leu | Val | Ile    | Leu    | Gly    | 10   |
| Laxaphycin E                                                        | Ada                | Hse | Dhb | OHPro | HSe | Phe | Leu | Ile | Ile    | Leu    | Gly    | 1    |
| Hormothamnin A                                                      | Aoa                | Hse | Dhb | OHPro | HSe | Phe | Leu | Ile | Ile    | Leu    | Gly    | 2    |
| Lobocyclamide A                                                     | Aoa                | Ser | Dhb | OHPro | HSe | Tyr | Leu | Ile | Ile    | Leu    | Gly    | 3    |
| Trichormamide A                                                     | Ada                | Ser | Ser | Pro   | Ser | Tyr | Leu | Ile | Ile    | Pro    | Gly    | 7    |
| Trichormamide D                                                     | Ada                | Gln | Dhb | Pro   | Ser | Tyr | Leu | Val | Phe    | Leu    | Gly    | 8    |
| Scytocyclamide A                                                    | Aoa                | Gln | Dhb | OHPro | HSe | Phe | Leu | Ile | Ile    | Leu    | Gly    | 4    |
| [l-Val <sup>8</sup> ]laxaphycin A                                   | Aoa                | Hse | Dhb | OHPro | HSe | Phe | Leu | Val | Ile    | Leu    | Gly    | 11   |
| [d-Val <sup>9</sup> ]laxaphycin A                                   | Aoa                | Hse | Dhb | OHPro | HSe | Phe | Leu | Ile | Val    | Leu    | Gly    | 11   |
| Acyclolaxaphycin A                                                  | Aoa                | Hse | Dhb | OHPro | HSe | Phe | Leu | Ile | Ile    | Leu    | Gly-OH | 11   |
| [des-Gly <sup>11</sup> ]<br>acyclolaxaphycin A                      | Aoa                | Hse | Dhb | OHPro | HSe | Phe | Leu | Ile | Ile    | Leu-OH |        | 11   |
| [des-(Leu <sup>10</sup> -Gly <sup>11</sup> )]<br>acyclolaxaphycin A | Aoa                | Hse | Dhb | OHPro | HSe | Phe | Leu | Ile | Ile-OH |        |        | 11   |



| 12-residue laxaphycins | 1   | 2   | 3        | 4     | 5     | 6   | 7       | 8      | 9   | 10     | 11  | 12  | Ref |
|------------------------|-----|-----|----------|-------|-------|-----|---------|--------|-----|--------|-----|-----|-----|
| Laxaphycin B           | Ada | Val | OHLeu    | Ala   | OHLeu | Gln | NMe-Ile | OHAAsn | Thr | Pro    | Leu | Thr | 1   |
| Laxaphycin B2          | Ada | Val | OHLeu    | Ala   | D-Leu | Gln | NMe-Ile | OHAAsn | Thr | Pro    | Leu | Thr | 5   |
| Laxaphycin B3          | Ada | Val | OHLeu    | Ala   | OHLeu | Gln | NMe-Ile | OHAAsn | Thr | OHPPro | Leu | Thr | 5   |
| Laxaphycin B4          | Ada | Val | OHLeu    | Hse   | OHLeu | Gln | NMe-Ile | OHAAsn | Thr | OHPPro | Leu | Thr | 10  |
| Laxaphycin B5          | Ada | Ile | OHLeu    | Val   | OHLeu | Gln | NMe-Ile | Asn    | Thr | Pro    | Tyr | Thr | 12  |
| Laxaphycin B6          | Ada | Ile | OHLeu    | Val   | Leu   | Gln | NMe-Ile | Asn    | Thr | Pro    | Tyr | Thr | 12  |
| Laxaphycin D           | Aoa | Val | OHLeu    | Ala   | OHLeu | Gln | NMe-Ile | OHAAsn | Thr | Pro    | Leu | Thr | 1   |
| Lobocyclamide B        | Ada | Val | OHLeu    | Ala   | OHLeu | Gln | NMe-Ile | OHThr  | Thr | OHPPro | Leu | Thr | 3   |
| Lobocyclamide C        | Aoa | Val | OHLeu    | Ala   | OHLeu | Gln | NMe-Ile | OHThr  | Thr | OHPPro | Leu | Thr | 3   |
| Lyngbyacyclamide A     | Ada | Val | OHLeu    | Hse   | Leu   | Gln | NMe-Ile | OHAAsn | Thr | Pro    | Phe | Thr | 6   |
| Lyngbyacyclamide B     | Ada | Val | OHLeu    | Hse   | Leu   | Gln | NMe-Ile | OHAAsn | Thr | OHPPro | Phe | Thr | 6   |
| Trichormamide B        | Ada | Ile | OHLeu    | Hse   | OHLeu | Gln | NMe-Ile | Ser    | Thr | Pro    | Tyr | Thr | 7   |
| Trichormamide C        | Ada | Val | OHLeu    | Ala   | OHLeu | Gln | NMe-Ile | Asn    | Thr | Pro    | Leu | Thr | 8   |
| Acyclolaxaphycin B     | Ada | Val | OHLeu-OH | H-Ala | OHLeu | Gln | NMe-Ile | OHAAsn | Thr | Pro    | Leu | Thr | 9   |
| Acyclolaxaphycin B3    | Ada | Val | OHLeu-OH | H-Ala | OHLeu | Gln | NMe-Ile | OHAAsn | Thr | OHPPro | Leu | Thr | 9   |
| Scytocyclamide B       | Aoa | Val | OHLeu    | Ala   | OHLeu | Gln | NMe-Ile | OHAAsn | Thr | Pro    | Leu | Thr | 4   |
| Scytocyclamide C       | Aoa | Val | OHLeu    | Ala   | Leu   | Gln | NMe-Ile | OHAAsn | Thr | Pro    | Leu | Thr | 4   |

1 = Frankmölle et al. 1992b, 2 = Gerwick et al. 1992, 3 = MacMillan et al. 2002, 4 = Grewe 2005, 5 = Bonnard et al. 2007, 6 = Maru et al. 2010, 7 = Luo et al. 2014, 8 = Luo et al. 2015, 9 = (Bornancin et al., 2015), 10 = Cai et al. 2018, 11 = Bornancin et al. 2019, 12 = (Sullivan et al., 2020),

Aoa –  $\beta$ -aminooctanoic acid, Ada –  $\beta$ -aminodecanoic acid, Hse - Homoserine, Dhb - Dehydrobutyrine, NMe-Ile – N-Methyl Isoleucine, OHPPro – 4-hydroxyproline, OHAAsn – 3-hydroxyasparagine, OHLeu – 3-hydroxyisoleucine, OHThr – 4-hydroxythreonine

630  
631

Table 2. Strains used in bioassays

| Organism                         | Strain     | Medium | Incubation temperature |
|----------------------------------|------------|--------|------------------------|
| <b>Fungi</b>                     |            |        |                        |
| <i>Candida albicans</i>          | FBCC 2462  | PDA    | 28°C                   |
| <i>Candida guilliermondii</i>    | FBCC 2457  | PDA    | 28°C                   |
| <i>Candida krusei</i>            | FBCC 2464  | PDA    | 28°C                   |
| <i>Candida parapsilosis</i>      | FBCC 2465  | PDA    | 28°C                   |
| <i>Filobasidiella neoformans</i> | FBCC 2466  | PDA    | 28°C                   |
| <i>Aspergillus niger</i>         | FBCC 2467  | PDA    | 28°C                   |
| <i>Aspergillus parasiticus</i>   | FBCC 2500  | PDA    | 28°C                   |
| <i>Aspergillus flavus</i>        | FBCC 2467  | PDA    | 28°C                   |
| <b>Bacteria</b>                  |            |        |                        |
| <i>Staphylococcus aureus</i>     | HAMBI 66   | BHI    | 37°C                   |
| <i>Enterococcus faecium</i>      | HAMBI 1821 | BHI    | 37°C                   |
| <i>Bacillus cereus</i>           | HAMBI 1881 | BHI    | 37°C                   |
| <i>Micrococcus luteus</i>        | HAMBI 2688 | BHI    | 37°C                   |
| <i>Pseudomonas aeruginosa</i>    | HAMBI 25   | BHI    | 37°C                   |
| <i>Escherichia coli</i>          | HAMBI 1723 | BHI    | 37°C                   |
| <i>Actinobacter baumannii</i>    | HAMBI 1760 | BHI    | 37°C                   |
| <i>Enterobacter aerogenes</i>    | HAMBI 1898 | BHI    | 37°C                   |
| <i>Salmonella enterica</i>       | HAMBI 2331 | BHI    | 37°C                   |

632  
633  
634  
635

Table 3. Structures of scytocyclamides from *S. hoffmannii* PCC 7110, with new variants A2, B2, and B3. Stereochemistry according to epimerase location in the biosynthetic gene cluster modules and Grewe 2005.

| 11-residue laxaphycins | 1   | 2     | 3     | 4        | 5     | 6     | 7     | 8     | 9                   | 10    | 11  |
|------------------------|-----|-------|-------|----------|-------|-------|-------|-------|---------------------|-------|-----|
| Scytocyclamide A       | Aoa | L-Gln | E-Dhb | L-OH-Pro | L-HSe | D-Phe | D-Leu | L-Ile | D- <i>allo</i> -Ile | L-Leu | Gly |

|                               |          |          |          |          |          |          |           |          |                     |           |           |           |
|-------------------------------|----------|----------|----------|----------|----------|----------|-----------|----------|---------------------|-----------|-----------|-----------|
| Scytocyclamide A2             | Aoa      | L-Gln    | E-Dhb    | L-Pro    | L-HSe    | D-Phe    | D-Leu     | L-Ile    | D- <i>allo</i> -Ile | L-Leu     | Gly       |           |
| <b>12-residue laxaphycins</b> | <b>1</b> | <b>2</b> | <b>3</b> | <b>4</b> | <b>5</b> | <b>6</b> | <b>7</b>  | <b>8</b> | <b>9</b>            | <b>10</b> | <b>11</b> | <b>12</b> |
| Scytocyclamide B              | Aoa      | L-Val    | D-OHLeu  | L-Ala    | D-OHLeu  | L-Gln    | NMe-L-Ile | D-OHAsn  | L-Thr               | L-Pro     | D-Leu     | L-Thr     |
| Scytocyclamide B2             | Aoa      | L-Val    | D-OHLeu  | L-Ala    | D-OHLeu  | L-Gln    | NMe-L-Ile | D-Asn    | L-Thr               | L-Pro     | D-Leu     | L-Thr     |
| Scytocyclamide B3             | Aoa      | L-Val    | D-OHLeu  | L-Ala    | D-Leu    | L-Gln    | NMe-L-Ile | D-Asn    | L-Thr               | L-Pro     | D-Leu     | L-Thr     |
| Scytocyclamide C              | Aoa      | L-Val    | D-OHLeu  | L-Ala    | D-Leu    | L-Gln    | NMe-L-Ile | D-OH-Asn | L-Thr               | L-Pro     | D-Leu     | L-Thr     |

636

637

638

639

Table 4. Scytocyclamides A-C from *S. hoffmannii* PCC 7110. Retention times ( $t_R$ ), experimental (Exp) mass of protonated scytocyclamides, difference ( $\Delta$ ) to calculated mass, chemical formula, and relative intensity (RI) of pronated scytocyclamides.

| 11-residue laxaphycins        | $t_R$ | $[M+H]^+$     |                |                                                                  |        |
|-------------------------------|-------|---------------|----------------|------------------------------------------------------------------|--------|
|                               | (min) | Exp ( $m/z$ ) | $\Delta$ (ppm) | Formula                                                          | RI (%) |
| Scytocyclamide A              | 3.46  | 1223.7399     | 0.0            | C <sub>61</sub> H <sub>99</sub> N <sub>12</sub> O <sub>14</sub>  | 98     |
| Scytocyclamide A2             | 3.56  | 1207.7422     | -2.3           | C <sub>61</sub> H <sub>99</sub> N <sub>12</sub> O <sub>13</sub>  | 2      |
| <b>12-residue laxaphycins</b> |       |               |                |                                                                  |        |
| Scytocyclamide B              | 3.10  | 1367.8173     | 2.1            | C <sub>63</sub> H <sub>111</sub> N <sub>14</sub> O <sub>19</sub> | 50     |
| Scytocyclamide B2             | 3.14  | 1351.8169     | -2.0           | C <sub>63</sub> H <sub>111</sub> N <sub>14</sub> O <sub>18</sub> | 18     |
| Scytocyclamide B3             | 3.27  | 1335.8228     | -1.4           | C <sub>63</sub> H <sub>111</sub> N <sub>14</sub> O <sub>17</sub> | 10     |
| Scytocyclamide C              | 3.23  | 1351.8190     | -0.4           | C <sub>63</sub> H <sub>111</sub> N <sub>14</sub> O <sub>18</sub> | 22     |

640

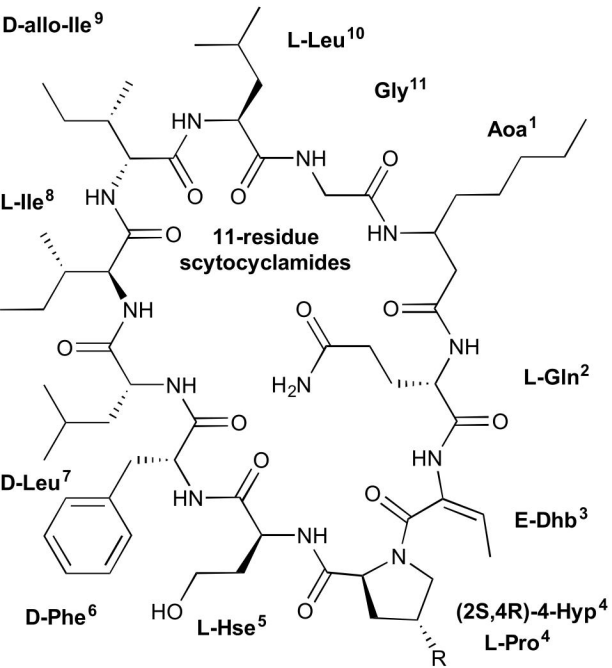

Scytocyclamide A: R = OH  
 Scytocyclamide A2: R = H

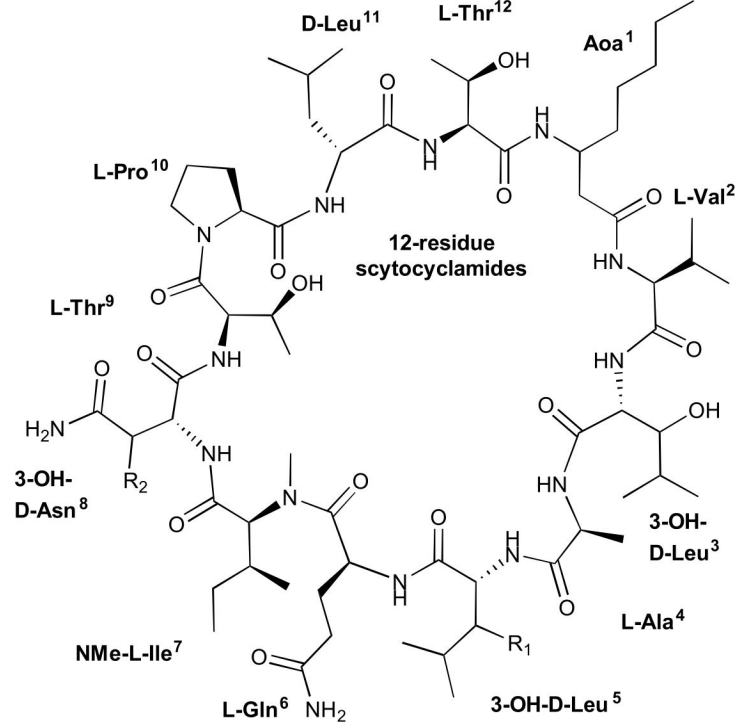

Scytocyclamide B: R<sub>1</sub> = OH, R<sub>2</sub> = OH  
 Scytocyclamide B2: R<sub>1</sub> = OH, R<sub>2</sub> = H  
 Scytocyclamide B3: R<sub>1</sub> = H, R<sub>2</sub> = H  
 Scytocyclamide C: R<sub>1</sub> = H, R<sub>2</sub> = OH

A

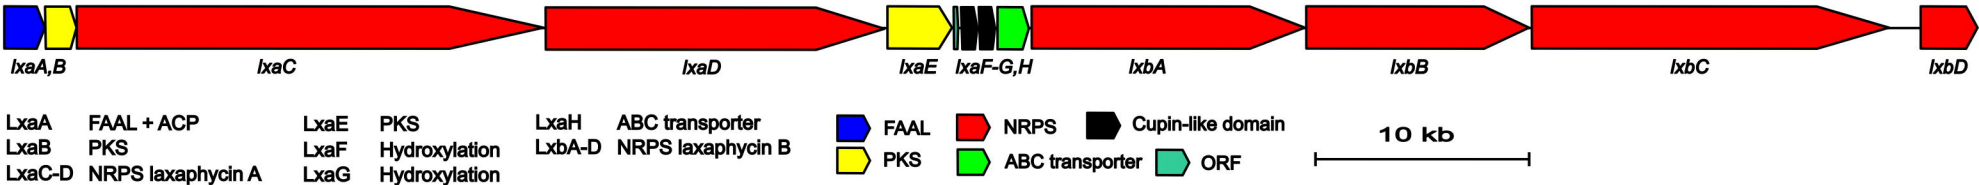

B

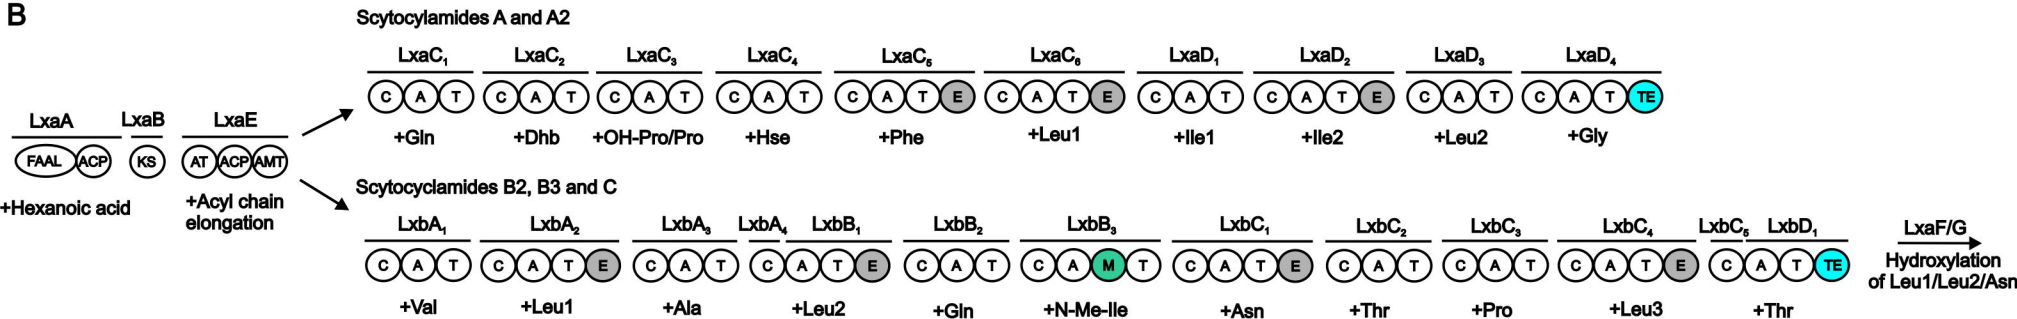



**A2**

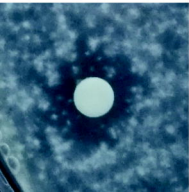

**B2**

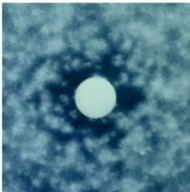

**A2+B2**

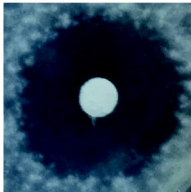

Source: https://www.biorxiv.org/content/10.1101/2020.05.29.098152v1.full.pdf
